# Supplementary material
Source: PubMed Central journal article supplement (PMC9651525)
Supplement: tpmd220134.SD1.pdf [file tpmd220134.SD1.pdf]

1 **Supplemental Table 1: Characteristics of studies on child mortality**

| Author year                                                             | Country                 | Design      | Comparison                                           | No. clusters      | Sample population         | Frequency and duration                    | Follow-up | Child mortality <sup>a</sup>    | OR/RR (95%CI)                                                                   |
|-------------------------------------------------------------------------|-------------------------|-------------|------------------------------------------------------|-------------------|---------------------------|-------------------------------------------|-----------|---------------------------------|---------------------------------------------------------------------------------|
| <b>Azithromycin MDA and child mortality reduction</b>                   |                         |             |                                                      |                   |                           |                                           |           |                                 |                                                                                 |
| Chandramohan 2019 <sup>13</sup>                                         | Burkina Faso and Mali   | Cluster-RCT | Azithromycin+ Antimalarials vs Placebo+Antimalarials | 9,618 households  | 21,737 children (3–59 m)  | 3-day cycles, monthly for four months, 3y | 3 years   | 24.8 vs 23.5, p=0.57            | 1.1 (0.88–1.3)                                                                  |
| Keenan 2018 <sup>9</sup> (MORDOR I)                                     | Malawi, Niger, Tanzania | Cluster-RCT | Azithromycin vs Placebo                              | 1,533 communities | 190,238 children (1–59 m) | Biannual, 2y                              | 2 years   | 14.6 vs 16.5, p<0.001           | <b>0.86 (0.80–0.93)</b>                                                         |
| Porco 2009 <sup>17</sup>                                                | Ethiopia                | Cluster-RCT | Azithromycin vs Untreated                            | 48 communities    | 18,415 children (1–5 y)   | Annual & Biannual & Quarterly, 1y         | 1 years   | 5.7 vs 12.1, p=0.01             | <b>0.53 (0.26–0.84)</b>                                                         |
| Keenan 2011 <sup>15</sup>                                               | Ethiopia                | Cohort      | Azithromycin vs Untreated                            | 24 subkebeles     | 5,507 children (1–5 y)    | Single                                    | 26 months | All-cause: 2.79 vs 8.18, p=0.06 | All-cause: <b>0.35 (0.17–0.74)</b><br>Infectious-cause: <b>0.20 (0.07–0.58)</b> |
| <b>Repeated azithromycin MDA on mortality reduction</b>                 |                         |             |                                                      |                   |                           |                                           |           |                                 |                                                                                 |
| Keenan 2019 <sup>14</sup> (MORDOR II)                                   | Niger                   | Cohort      | 3rd vs 1st year                                      | 594 communities   | 76,092 children (1–59 m)  | Biannual, 1y                              | 1 year    | 23.3 vs 24.0, p=0.55            | Not available                                                                   |
| <b>Different frequencies of azithromycin MDA on mortality reduction</b> |                         |             |                                                      |                   |                           |                                           |           |                                 |                                                                                 |
| O'Brien 2018 <sup>16</sup>                                              | Niger                   | Cluster-RCT | Annual vs Biannual-children only                     | 48 communities    | 5304 children (6 m–12 y)  | Annual vs Biannual, 3y                    | 3 years   | 35.6 vs 29.0, p=0.07            | All-cause: 0.81 (0.66–1.00)<br>Infectious-cause: <b>0.73 (0.57–0.94)</b>        |

|                          |          |             |                                               |                |                         |                                     |        |                           |               |
|--------------------------|----------|-------------|-----------------------------------------------|----------------|-------------------------|-------------------------------------|--------|---------------------------|---------------|
| Porco 2009 <sup>17</sup> | Ethiopia | Cluster-RCT | Annual vs Biannual vs Quarterly-children only | 48 communities | 18,415 children (1-9 y) | Annual vs Biannual vs Quarterly, 1y | 1 year | 3.2 vs 4.9 vs 4.7, p>0.05 | Not available |
|--------------------------|----------|-------------|-----------------------------------------------|----------------|-------------------------|-------------------------------------|--------|---------------------------|---------------|

2 OR, odds ratio; RR, rate ratio; CI, confidence interval; <sup>a</sup> child mortality, 1000 person-years

3 **Supplemental Table 2: Characteristics of studies on malaria**

| Author year                                  | Country               | Design      | Comparison                                          | No. cluster      | Sample population         | Frequency and duration                    | Follow-up         | Outcome                                                                                                                            | OR/RR (95%CI)                                                                       |
|----------------------------------------------|-----------------------|-------------|-----------------------------------------------------|------------------|---------------------------|-------------------------------------------|-------------------|------------------------------------------------------------------------------------------------------------------------------------|-------------------------------------------------------------------------------------|
| <b>Azithromycin MDA on malaria reduction</b> |                       |             |                                                     |                  |                           |                                           |                   |                                                                                                                                    |                                                                                     |
| Arzika 2019 <sup>6</sup><br>[MORDOR]         | Niger                 | Cluster-RCT | Azithromycin vs placebo                             | 30 communities   | 315 children (1–59 m)     | Biannual, 2y                              | 2 years           | Malaria parasitemia: 3.5% vs 4.8%; <b>P=0.02</b>                                                                                   | <b>0.54 (0.30–0.97)</b>                                                             |
| Chandramohan 2019 <sup>13</sup>              | Burkina Faso and Mali | Cluster-RCT | Azithromycin+Antimalarials vs Placebo+Antimalarials | 9,618 households | 21,737 children (3–59 m)  | 3-day cycles, monthly for four months, 3y | 3 years           | Malaria parasitemia                                                                                                                | 0.97 (0.93–1.01)                                                                    |
| Hart 2020 <sup>20</sup><br>[MORDOR]          | Malawi                | Cluster-RCT | Azithromycin vs placebo                             | 30 communities   | 1200 children (1–59 m)    | Biannual, 2y                              | 2 years           | Malaria parasitemia: <i>P</i> =0.78                                                                                                | 0.89 (0.53–1.50)                                                                    |
| Bloch 2019 <sup>18</sup><br>[MORDOR]         | Tanzania              | Cohort      | Azithromycin vs placebo                             | 30 communities   | 738 children (1–35 m)     | Biannual, 2y                              | 2 years           | Rapid diagnostic test: 13.2% vs 6.6%, <i>P</i> =0.34<br>Clinical malaria: 1.9% vs 1.2%, <i>P</i> =0.66                             | 2.15 (1.16–3.99)<br>1.38 (0.38–4.95)                                                |
| Hart 2014 <sup>19</sup>                      | Gambia                | Cluster-RCT | Azithromycin vs control                             | 48 communities   | 3,646 children (0–5 y)    | Annual, 3y                                | 30 months         | Spleen rate                                                                                                                        | <b>0.35 (0.15–0.82)</b>                                                             |
| Schachterle 2014 <sup>21</sup>               | Tanzania              | Cohort      | Azithromycin vs control                             | 8 villages       | 1,986 residents (All age) | Single                                    | 1, 3, 4, 6 months | <i>Plasmodium falciparum</i> :<br>Month 1: 1.6% vs 4.7%<br>Month 3: 2.1% vs 2.5%<br>Month 4: 0.8% vs 1.5%<br>Month 6: 0.6% vs 0.7% | <b>0.34 (0.17–0.64)</b><br>0.83 (0.38–1.77)<br>0.52 (0.13–1.81)<br>0.95 (0.18–5.12) |
| Sadiq 1995 <sup>25</sup>                     | Gambia, West Africa   | Cluster-RCT | Azithromycin vs tetracycline eye ointment           | 8 villages       | 226 children (5-14 y)     | Weekly, 3w                                | 28 days           | <i>Plasmodium falciparum</i> : 41% vs 74%<br><i>Plasmodium malariae</i> : 0% vs 11%                                                | <b>0.56 (0.44–0.71)</b><br>0 (0)                                                    |

|                              |       |             |                    |                |                          |                        |           |                                                                                                                                                                                                               |                         |
|------------------------------|-------|-------------|--------------------|----------------|--------------------------|------------------------|-----------|---------------------------------------------------------------------------------------------------------------------------------------------------------------------------------------------------------------|-------------------------|
|                              |       |             |                    |                |                          |                        |           | Clinical malaria:15% vs 32%                                                                                                                                                                                   | <b>0.45 (0.27–0.75)</b> |
|                              |       |             |                    |                |                          |                        |           | Spleen rate: 27% vs 55%                                                                                                                                                                                       | <b>0.5 (0.36–0.70)</b>  |
| Gaynor 2014 <sup>22</sup>    | Niger | Cluster–RCT | Annual vs Biannual | 24 communities | 1030 children (< 1–72 m) | Annual or biannual, 1y | 12 months | Malaria parasitemia:<br>29.8% vs 19.5%, <b>P=0.03</b><br>Parasite density:<br>354 vs 74, <b>P=0.03</b><br>Gametocytemia:<br>1.5% vs 0%, <i>P</i> =0.29<br>Hemoglobin:<br>10.0 vs 10.2, <i>P</i> =0.20         | Not available           |
| O'Brien 2017 <sup>23</sup>   | Niger | Cluster–RCT | Annual vs Biannual | 24 communities | 1032 children (6–60 m)   | Annual or biannual, 3y | 3 years   | Malaria parasitemia:<br>54.5% vs 54.5%, <i>P</i> =0.995<br>Parasite density:<br>7,710 vs 4,930, <i>P</i> =0.11<br>Gametocytemia:<br>0.5% vs 0.7%, <i>P</i> =0.63<br>Hemoglobin:<br>9.4 vs 9.4, <i>P</i> =0.87 | Not available           |
| Oldenburg 2018 <sup>24</sup> | Niger | Cluster–RCT | Annual vs Biannual | 24 communities | 1037 children (6 m–12 y) | Annual or biannual, 3y | 3 years   | Malaria prevalence<br>50.6% vs 42.6%, <i>P</i> =0.29<br>Parasite density:<br>6,260 vs 10,660, <i>P</i> =0.57<br>Clinical malaria<br>6.8% vs 5.9%, <i>P</i> =0.69<br>Hemoglobin<br>9.2 vs 9.5, <i>P</i> =0.21  | Not available           |

4 OR odds ratio; RR rate ratio; CI confidence interval

5

6 **Supplemental Table 3: Characteristics of studies on general morbidity or condition**

| Author year                          | Country                 | Design       | Comparison                                          | No. cluster      | Sample population      | Frequency and duration                              | Follow-up    | Outcome                            | OR/RR (95%CI)           |
|--------------------------------------|-------------------------|--------------|-----------------------------------------------------|------------------|------------------------|-----------------------------------------------------|--------------|------------------------------------|-------------------------|
| <b>General morbidity and symptom</b> |                         |              |                                                     |                  |                        |                                                     |              |                                    |                         |
| Chandramohan 2019 <sup>13</sup>      | Burkina Faso and Mali   | Cluster –RCT | Azithromycin+Antimalarials vs Placebo+Antimalarials | 9,618 households | 21,737 children (<5 y) | 3–day cycles, monthly for four months each year, 3y | 3 years      | Respiratory tract infection        | <b>0.85 (0.81–0.89)</b> |
|                                      |                         |              |                                                     |                  |                        |                                                     |              | Diarrhea                           | <b>0.85 (0.79–0.91)</b> |
|                                      |                         |              |                                                     |                  |                        |                                                     |              | Fever                              | <b>0.79 (0.72–0.86)</b> |
| Coles 2012 <sup>7</sup>              | Tanzania                | Cohort       | Azithromycin vs untreated                           | 8 communities    | 1,036 children (<5 y)  | Single                                              | 1,3,6 months | Respiratory tract infection at 1 m | <b>0.62 (0.43–0.91)</b> |
|                                      |                         |              |                                                     |                  |                        |                                                     |              | Respiratory tract infection at 3 m | 0.91 (0.69–1.20)        |
|                                      |                         |              |                                                     |                  |                        |                                                     |              | Respiratory tract infection at 6 m | 1.00 (0.76–1.30)        |
| Coles 2011 <sup>8</sup>              | Tanzania                | Cohort       | Azithromycin vs untreated                           | 8 communities    | 1,036 children (<5 y)  | Single                                              | 1,3,6 months | Diarrhea at 0–1 m                  | <b>0.61 (0.39–0.95)</b> |
|                                      |                         |              |                                                     |                  |                        |                                                     |              | Diarrhea at 1–3 m                  | 0.76 (0.54–1.07)        |
|                                      |                         |              |                                                     |                  |                        |                                                     |              | Diarrhea at 3–6 m                  | 0.85 (0.60–1.20)        |
| Fry 2002 <sup>33</sup>               | Nepal                   | Cohort       | Azithromycin vs untreated                           | 8 villages       | 458 children (1–10 y)  | Single                                              | 10 days      | Respiratory tract infection        | <b>0.59 (0.41–0.90)</b> |
|                                      |                         |              |                                                     |                  |                        |                                                     |              | Diarrhea                           | 0.79 (0.49–1.27)        |
|                                      |                         |              |                                                     |                  |                        |                                                     |              | Fever                              | <b>0.46 (0.28–0.76)</b> |
|                                      |                         |              |                                                     |                  |                        |                                                     |              | Abdominal pain                     | 0.91 (0.59–1.40)        |
|                                      |                         |              |                                                     |                  |                        |                                                     |              | Vomiting                           | 0.62 (0.33–1.16)        |
| Headache                             | <b>0.50 (0.27–0.93)</b> |              |                                                     |                  |                        |                                                     |              |                                    |                         |
| Whitty 1999 <sup>26</sup>            | Gambian                 | Cluster –RCT | Azithromycin vs topical tetracycline                | 8 villages       | 804 children (<14 y)   | Weekly, 15 d                                        | 28 days      | Respiratory tract infection        | 0.87 (0.70–1.08)        |
|                                      |                         |              |                                                     |                  |                        |                                                     |              | Diarrhea                           | <b>0.26 (0.15–0.46)</b> |
|                                      |                         |              |                                                     |                  |                        |                                                     |              | Fever                              | <b>0.80 (0.72–0.88)</b> |
|                                      |                         |              |                                                     |                  |                        |                                                     |              | Abdominal pain                     | 0.80 (0.62–1.03)        |
|                                      |                         |              |                                                     |                  |                        |                                                     |              | Vomiting                           | <b>0.59 (0.46–0.77)</b> |
| Headache                             | <b>0.78 (0.68–0.89)</b> |              |                                                     |                  |                        |                                                     |              |                                    |                         |

|                                         |           |                   |                              |                   |                           |               |                                         |                                                                                                                                                 |                                                                 |
|-----------------------------------------|-----------|-------------------|------------------------------|-------------------|---------------------------|---------------|-----------------------------------------|-------------------------------------------------------------------------------------------------------------------------------------------------|-----------------------------------------------------------------|
| Oldenburg 2018 <sup>42</sup>            | Niger     | Cluster<br>-RCT   | Azithromycin vs<br>placebo   | 30<br>communities | 1,712 children<br>(1-5 m) | Single        | 2 weeks                                 | Diarrhea <b>19.3% vs 28.1%, P=0.03</b><br>Abdominal pain: 9.1% vs 10.2%, P=0.75<br>Vomiting: 15.9% vs 21%, P=0.07                               | <b>0.68 (0.49–0.96)</b><br>0.90 (0.45–1.77)<br>0.76 (0.56–1.02) |
| <b>Carriage of pathogenic organisms</b> |           |                   |                              |                   |                           |               |                                         |                                                                                                                                                 |                                                                 |
| Batt 2003 <sup>30</sup>                 | Tanzania  | Cross-s<br>ection | Before vs after<br>treatment | 1 village         | 1,402 residents           | Single        | 2, 6<br>months                          | Sp carriage at baseline: 11%<br>Sp carriage at 2 m: 12%, P>0.05<br>Sp carriage at 6 m: 7%, P>0.05                                               | Not available                                                   |
| Burr 2014 <sup>31</sup>                 | Gambia    | Cross-s<br>ection | Azithromycin vs<br>untreated | 30 villages       | 1575 residents            | Annual, 3y    | 1, 6<br>months<br>after the<br>last MDA | Sp carriage at 1 m<br><br>Sp carriage at 6 m                                                                                                    | <b>0.30 (0.22–0.42)</b><br><br>1.09 (0.80–1.48)                 |
| Coles 2013 <sup>32</sup>                | Tanzania  | Cohort            | Azithromycin vs<br>untreated | 8 communities     | 1015 children<br>(<5 y)   | Single        | 1, 3, and 6<br>months                   | Sp carriage at 1 m: 41.4% vs 38.5% P>0.05<br>Sp carriage at 3 m: 22.0% vs 35.1%, P>0.05<br>Sp carriage at 6 m: 51.8% vs 50.9%, P>0.05           | Not available                                                   |
| Fry 2002 <sup>33</sup>                  | Nepal     | Cohort            | Azithromycin vs<br>untreated | 8 villages        | 458 children<br>(1–10 y)  | Single        | 180 days                                | Sp carriage at 10 d: <b>42% vs 85%, P&lt;0.05</b><br>Sp carriage at 180 d: 89% vs 85%, P>0.05                                                   | Not available                                                   |
| Haug 2010 <sup>34</sup>                 | Ethiopia  | Cross-s<br>ection | Azithromycin vs<br>untreated | 8 villages        | 120 children<br>(1–5 y)   | Biannual, 3y  | 36 months                               | Sp carriage: P>0.05                                                                                                                             | Not available                                                   |
| Leach 1997 <sup>29</sup>                | Australia | Cross-s<br>ection | Before vs after<br>treatment | 1 community       | 79 children (<15<br>y)    | Single        | 3 weeks, 2<br>and 6<br>months           | Sp carriage at baseline: 68%<br>Sp carriage at 3 w: <b>29%, P&lt;0.05</b><br>Sp carriage at 2 m: 78%, P>0.05<br>Sp carriage at 6 m: 87%, P>0.05 | Not available                                                   |
| Skalet 2010 <sup>35</sup>               | Ethiopia  | Cluster<br>-RCT   | Azithromycin vs<br>untreated | 24<br>communities | 110 children<br>(<10 y)   | Quarterly, 1y | 12 months                               | Sp carriage 78% vs 81.7%, P>0.05                                                                                                                | Not available                                                   |
| Doan 2020 <sup>36</sup>                 | Niger     | Cluster<br>-RCT   | Azithromycin vs<br>placebo   | 30<br>communities | 890 children (<5<br>y)    | Biannual, 3y  | 3 years                                 | Coronavirus burden: <b>P&lt;0.05</b><br>Coronavirus prevalence: P>0.05                                                                          | Not available                                                   |
| Doan 2018 <sup>27</sup>                 | Niger     | Cluster           | Azithromycin vs              | 30 villages       | 1,125 children            | Biannual, 2y  | 30 months                               | Gut microbial structure: <b>P&lt;0.001</b>                                                                                                      | Not available                                                   |

|                                    |                             |                 |                                                                |                     |                             |                                                              |           |                                                                                                                  |                                                                              |
|------------------------------------|-----------------------------|-----------------|----------------------------------------------------------------|---------------------|-----------------------------|--------------------------------------------------------------|-----------|------------------------------------------------------------------------------------------------------------------|------------------------------------------------------------------------------|
|                                    |                             | -RCT            | placebo                                                        |                     | (<5 y)                      |                                                              |           | Diversity of the gut microbiome: <b>P=0.005</b>                                                                  |                                                                              |
| Doan 2019 <sup>28</sup>            | Niger                       | Cluster<br>-RCT | Azithromycin vs<br>placebo                                     | 30 villages         | 600 children (<5<br>y)      | Biannual, 2y                                                 | 24 months | Diversity of the gut microbiome: <i>P</i> =0.08<br>Reduction of 35 gut pathogenic species: <b>P&lt;<br/>0.01</b> | Not available                                                                |
| <b>Nutrition</b>                   |                             |                 |                                                                |                     |                             |                                                              |           |                                                                                                                  |                                                                              |
| Amza 2013 <sup>37</sup>            | Niger                       | Cluster<br>-RCT | 2 vs 1 MDA                                                     | 24<br>communities   | 1,030 children<br>(6 m–5 y) | Annual or<br>biannual, 1y                                    | 1 year    | Wasting<br>Low MUAC<br>Stunting<br>Underweight                                                                   | 0.75 (0.46–1.23)<br>0.93 (0.59–1.46)<br>0.89 (0.65–1.22)<br>0.81 (0.57–1.16) |
| Amza 2014 <sup>39</sup>            | Niger                       | Cluster<br>-RCT | 2 vs 1 MDA                                                     | 24<br>communities   | 1,034 children<br>(6 m–5 y) | Annual or<br>biannual, 3y                                    | 3 years   | Wasting<br>Low MUAC<br>Stunting<br>Underweight                                                                   | 0.89 (0.53–1.49)<br>0.62 (0.32–1.17)<br>0.78 (0.54–1.13)<br>0.88 (0.66–1.19) |
| Burr 2014 <sup>40</sup>            | Gambia                      | Cluster<br>-RCT | 3 vs 1 MDA                                                     | 48 clusters         | 2,886 children<br>(1–4 y)   | Annual, 3y or<br>1y                                          | 3 years   | Wasting<br>Stunting<br>Underweight                                                                               | 1.07 (0.81–1.40)<br>1.12 (0.90–1.41)<br>1.10 (0.89–1.37)                     |
| Gore-Langton<br>2020 <sup>41</sup> | Burkina<br>Faso and<br>Mali | Cluster<br>-RCT | Azithromycin+A<br>ntimalarials vs<br>Placebo+Antim<br>alarials | 9,618<br>households | 4,000 children<br>(3–59m)   | 3–day cycles,<br>monthly for<br>four months<br>each year, 3y | 3 years   | Wasting<br>Low MUAC<br>Stunting<br>Underweight                                                                   | 0.94 (0.81–1.08)<br>0.79 (0.62–1.01)<br>0.92 (0.83–1.02)<br>1.01 (0.90–1.13) |
| Keenan 2019 <sup>38</sup>          | Ethiopia                    | Cluster<br>-RCT | Azithromycin vs<br>untreated                                   | 24<br>communities   | 530 children (<<br>5 y)     | Biannual, 3y                                                 | 3 years   | Height<br>Weight                                                                                                 | p=0.60<br>p=0.54                                                             |

7 *SP Streptococcus pneumoniae*; OR, odds ratio; RR, rate ratio; CI, confidence interval; MUAC, mid-upper arm circumference.

8

9 Supplemental Table 4: Risk of bias of studies on child mortality

| Study                           | Confounding                 |                          | Selection bias                 |                            | Misclassification bias                  | Performance bias                              |                                           | Detection bias                      | Attrition bias                 | Reporting bias             |
|---------------------------------|-----------------------------|--------------------------|--------------------------------|----------------------------|-----------------------------------------|-----------------------------------------------|-------------------------------------------|-------------------------------------|--------------------------------|----------------------------|
|                                 | Bias due to confounding (O) | Selection into study (O) | Random sequence generation (R) | Allocation concealment (R) | Bias in intervention classification (O) | Bias due to deviations from interventions (O) | Masking of participants and personnel (R) | Masking of outcome assessors (R, O) | Incomplete outcome data (R, O) | Selective reporting (R, O) |
| <b>RCT</b>                      |                             |                          |                                |                            |                                         |                                               |                                           |                                     |                                |                            |
| Chandramohan 2019 <sup>13</sup> | NA                          | NA                       | Unclear                        | Low                        | NA                                      | NA                                            | Low                                       | Low                                 | Low                            | Low                        |
| Keenan 2018 <sup>9</sup>        | NA                          | NA                       | Low                            | Low                        | NA                                      | NA                                            | Low                                       | Low                                 | Low                            | Low                        |
| O'Brien 2018 <sup>16</sup>      | NA                          | NA                       | Low                            | Unclear                    | NA                                      | NA                                            | Unclear                                   | Unclear                             | Low                            | Low                        |
| Porco 2009 <sup>17</sup>        | NA                          | NA                       | Moderate                       | Unclear                    | NA                                      | NA                                            | Unclear                                   | Low                                 | Low                            | Low                        |
| <b>Non-RCT</b>                  |                             |                          |                                |                            |                                         |                                               |                                           |                                     |                                |                            |
| Keenan 2011 <sup>15</sup>       | Unclear                     | Moderate                 | NA                             | NA                         | Moderate                                | Unclear                                       | NA                                        | Low                                 | Low                            | Low                        |
| Keenan 2019 <sup>14</sup>       | Moderate                    | Low                      | NA                             | NA                         | Low                                     | Unclear                                       | NA                                        | Low                                 | Low                            | Low                        |

10 Abbreviations: O, observational, non-randomized studies; R, randomized studies

11



12 **Supplemental Table 5: Risk of bias of included studies on malaria**

| Study                           | Confounding                 | Selection bias           |                                |                            | Misclassification bias                 | Performance bias                              |                                           | Detection bias                      | Attrition bias                 | Reporting bias             |
|---------------------------------|-----------------------------|--------------------------|--------------------------------|----------------------------|----------------------------------------|-----------------------------------------------|-------------------------------------------|-------------------------------------|--------------------------------|----------------------------|
|                                 | Bias due to confounding (O) | Selection into study (O) | Random sequence generation (R) | Allocation concealment (R) | Bias in intervention classification(O) | Bias due to deviations from interventions (O) | Masking of participants and personnel (R) | Masking of outcome assessors (R, O) | Incomplete outcome data (R, O) | Selective reporting (R, O) |
| <b>RCT</b>                      |                             |                          |                                |                            |                                        |                                               |                                           |                                     |                                |                            |
| Arzika 2019 <sup>6</sup>        | NA                          | NA                       | Low                            | Low                        | NA                                     | NA                                            | Low                                       | Low                                 | Low                            | Low                        |
| Chandramohan 2019 <sup>13</sup> | NA                          | NA                       | Unclear                        | Low                        | NA                                     | NA                                            | Low                                       | Low                                 | Low                            | Low                        |
| Gaynor 2014 <sup>22</sup>       | NA                          | NA                       | Low                            | Low                        | NA                                     | NA                                            | High                                      | Low                                 | Low                            | Low                        |
| Hart 2014 <sup>19</sup>         | NA                          | NA                       | Moderate                       | Unclear                    | NA                                     | NA                                            | Moderate                                  | Low                                 | Low                            | Low                        |
| Hart 2020 <sup>20</sup>         | NA                          | NA                       | Low                            | Low                        | NA                                     | NA                                            | Unclear                                   | Unclear                             | Low                            | Low                        |
| O'Brien 2017 <sup>23</sup>      | NA                          | NA                       | Low                            | Unclear                    | NA                                     | NA                                            | Unclear                                   | Low                                 | Low                            | Low                        |
| Oldenburg 2018 <sup>24</sup>    | NA                          | NA                       | Low                            | Low                        | NA                                     | NA                                            | High                                      | Low                                 | Low                            | Low                        |
| Sadiq 1995 <sup>25</sup>        | NA                          | NA                       | Unclear                        | Unclear                    | NA                                     | NA                                            | High                                      | Low                                 | Low                            | Low                        |
| <b>Non-RCT</b>                  | NA                          | NA                       |                                |                            |                                        |                                               |                                           |                                     |                                |                            |
| Bloch 2019 <sup>18</sup>        | Low                         | Low                      | NA                             | NA                         | Low                                    | Low                                           | NA                                        | Low                                 | Unclear                        | Low                        |
| Schachterle 2014 <sup>21</sup>  | Moderate                    | Moderate                 | NA                             | NA                         | Low                                    | Moderate                                      | NA                                        | Unclear                             | Low                            | Low                        |

13 Abbreviations: O, observational, non-randomized studies; R, randomized studies

14

15 **Supplemental Table 6: Risk of bias of included studies on general morbidity or condition**

| Study                           | Confounding                 | Selection bias           |                                |                            | Misclassification bias                 | Performance bias                              |                                           | Detection bias                      | Attrition bias                 | Reporting bias             |
|---------------------------------|-----------------------------|--------------------------|--------------------------------|----------------------------|----------------------------------------|-----------------------------------------------|-------------------------------------------|-------------------------------------|--------------------------------|----------------------------|
|                                 | Bias due to confounding (O) | Selection into study (O) | Random sequence generation (R) | Allocation concealment (R) | Bias in intervention classification(O) | Bias due to deviations from interventions (O) | Masking of participants and personnel (R) | Masking of outcome assessors (R, O) | Incomplete outcome data (R, O) | Selective reporting (R, O) |
| <b>RCT</b>                      |                             |                          |                                |                            |                                        |                                               |                                           |                                     |                                |                            |
| Amza 2014 <sup>39</sup>         | NA                          | NA                       | Low                            | Low                        | NA                                     | NA                                            | High                                      | Low                                 | Low                            | Low                        |
| Amza 2013 <sup>37</sup>         | NA                          | NA                       | Low                            | Unclear                    | NA                                     | NA                                            | High                                      | Unclear                             | Low                            | Low                        |
| Burr 2014 <sup>40</sup>         | Low                         | Low                      | NA                             | NA                         | Low                                    | Low                                           | NA                                        | Unclear                             | Low                            | Low                        |
| Chandramohan 2019 <sup>13</sup> | NA                          | NA                       | Unclear                        | Low                        | NA                                     | NA                                            | Low                                       | Low                                 | Low                            | Low                        |
| Doan 2020 <sup>36</sup>         | NA                          | NA                       | Low                            | Low                        | NA                                     | NA                                            | Unclear                                   | Low                                 | Low                            | Low                        |
| Doan 2019 <sup>28</sup>         | NA                          | NA                       | Low                            | Low                        | NA                                     | NA                                            | Low                                       | Low                                 | Low                            | Low                        |
| Doan 2018 <sup>27</sup>         | NA                          | NA                       | Low                            | Low                        | NA                                     | NA                                            | Low                                       | Low                                 | Low                            | Low                        |
| Gore-Langton 2020 <sup>41</sup> | NA                          | NA                       | Unclear                        | Unclear                    | NA                                     | NA                                            | High                                      | Unclear                             | Low                            | Low                        |
| Keenan 2019 <sup>38</sup>       | NA                          | NA                       | Low                            | Low                        | NA                                     | NA                                            | Unclear                                   | Low                                 | Low                            | Low                        |
| Whitty 1999 <sup>26</sup>       | NA                          | NA                       | Unclear                        | Unclear                    | NA                                     | NA                                            | Unclear                                   | Unclear                             | Low                            | Low                        |
| Oldenburg 2018 <sup>42</sup>    | NA                          | NA                       | Low                            | Unclear                    | NA                                     | NA                                            | Low                                       | Low                                 | Low                            | Low                        |
| Skalet 2010 <sup>35</sup>       | NA                          | NA                       | Low                            | Unclear                    | NA                                     | NA                                            | High                                      | Low                                 | Low                            | Low                        |
| <b>Non-RCT</b>                  |                             |                          |                                |                            |                                        |                                               |                                           |                                     |                                |                            |

|                          |         |         |    |    |         |         |    |         |          |     |
|--------------------------|---------|---------|----|----|---------|---------|----|---------|----------|-----|
| Batt 2003 <sup>30</sup>  | Unclear | Unclear | NA | NA | Low     | Low     | NA | Unclear | Low      | Low |
| Burr 2014 <sup>31</sup>  | Unclear | Low     | NA | NA | Low     | Low     | NA | Unclear | Low      | Low |
| Coles 2013 <sup>32</sup> | Unclear | Unclear | NA | NA | Low     | Unclear | NA | Unclear | Low      | Low |
| Coles 2012 <sup>7</sup>  | Low     | Low     | NA | NA | Low     | Low     | NA | Unclear | Low      | Low |
| Coles 2011 <sup>8</sup>  | Low     | Low     | NA | NA | Low     | Low     | NA | Unclear | Low      | Low |
| Fry 2002 <sup>33</sup>   | Low     | Low     | NA | NA | Low     | Low     | NA | Unclear | Moderate | Low |
| Haug 2010 <sup>34</sup>  | Low     | Unclear | NA | NA | Unclear | Unclear | NA | Unclear | Low      | Low |
| Leach 1997 <sup>29</sup> | Unclear | Unclear | NA | NA | Low     | Low     | NA | Unclear | Low      | Low |

16 Abbreviations: O, observational, non-randomized studies; R, randomized studies

17 **Supplemental Figure 1: Forest plot for azithromycin MDA and abdominal pain**

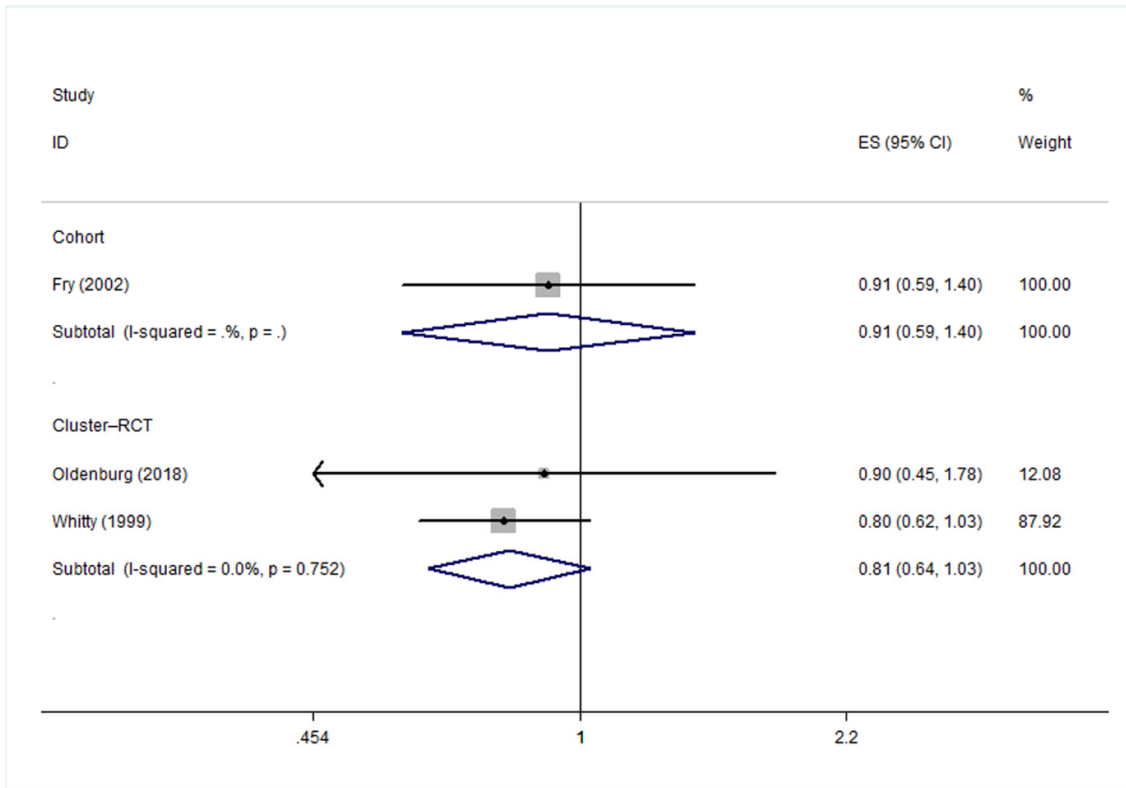

18

19

20 **Supplemental Figure 3: Forest plot for azithromycin MDA and vomiting**

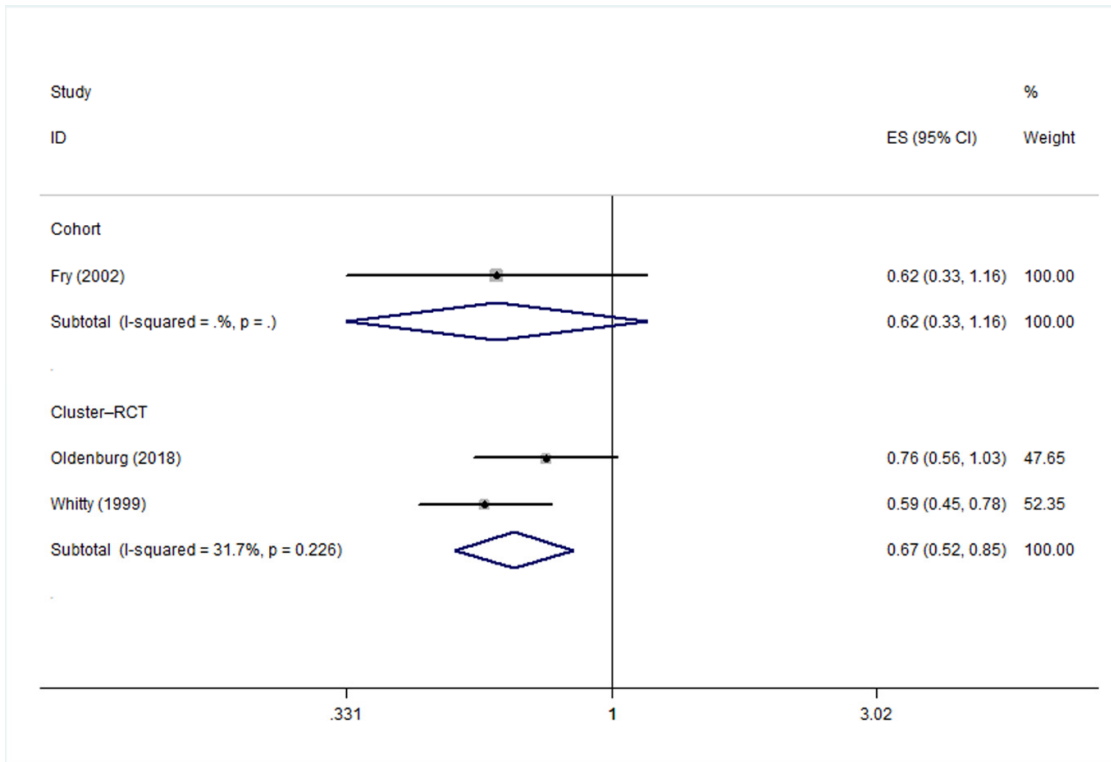

21
